# Supplementary material
Source: HighWire-hosted journal article supplement (https://erj.ersjournals.com/content/61/5/2300416)

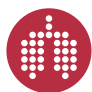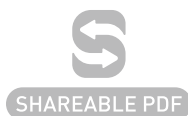

# Eight lessons from 2 years of use of the Post-COVID-19 Functional Status scale

Cindy M.M. de Jong <sup>1</sup>, Y.N. Jenny Le <sup>2</sup>, Gudula J.A.M. Boon <sup>1</sup>, Stefano Barco <sup>3,4</sup>,  
Frederikus A. Klok <sup>1</sup> and Bob Siegerink <sup>2</sup>

<sup>1</sup>Department of Medicine - Thrombosis and Hemostasis, Leiden University Medical Center, Leiden, The Netherlands. <sup>2</sup>Department of Clinical Epidemiology, Leiden University Medical Center, Leiden, The Netherlands. <sup>3</sup>Department of Angiology, University Hospital Zurich, Zurich, Switzerland. <sup>4</sup>Center for Thrombosis and Hemostasis, University Hospital Mainz, Mainz, Germany.

Corresponding author: Bob Siegerink ([b.siegerink@lumc.nl](mailto:b.siegerink@lumc.nl))

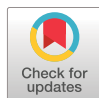

Shareable abstract (@ERSpublications)

**Based on the literature and users' experiences, lessons could be learned after 2 years' use of the Post-COVID-19 Functional Status (PCFS) scale, that could contribute to its optimal use. All in all, the PCFS scale provided added value during the pandemic.** <https://bit.ly/3KkI5Ak>

**Cite this article as:** de Jong CMM, Le YNJ, Boon GJAM, et al. Eight lessons from 2 years of use of the Post-COVID-19 Functional Status scale. *Eur Respir J* 2023; 61: 2300416 [DOI: 10.1183/13993003.00416-2023].

This single-page version can be shared freely online.

Copyright ©The authors 2023.

This version is distributed under the terms of the Creative Commons Attribution Non-Commercial Licence 4.0. For commercial reproduction rights and permissions contact [permissions@ersnet.org](mailto:permissions@ersnet.org)

Received: 9 March 2023  
Accepted: 4 April 2023

*To the Editor:*

The number of confirmed cases of coronavirus disease 2019 (COVID-19) worldwide exceeded 750 million as of February 2023 [1], leaving an estimated 65 million individuals experiencing post-acute sequelae of COVID-19 or “long COVID”, or a modelled estimate of 6.2% of individuals experiencing long COVID symptoms 3 months after symptomatic SARS-CoV-2 infection [2, 3]. Early in the pandemic, we proposed the Post-COVID-19 Functional Status (PCFS) scale in the *European Respiratory Journal* [4], which resulted from a slight adaptation of the Post-Venous thromboembolism Functional Status (PVFS) scale developed in 2019 [5, 6]. The PCFS scale is designed to monitor functional recovery and identify patients with incomplete or poor recovery after COVID-19 in research and clinical practice.

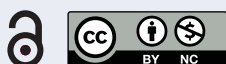

Supplement: inline-supplementary-material-1 [file inline-supplementary-material-1.pdf]
